# Supplementary material for: Accounting for differences between Infinium MethylationEPIC v2 and v1 in DNA methylation-based tools
Source: PubMed Central journal article supplement — bioRxiv. 2025 Jun 12:2024.07.02.600461. Originally published 2024 Jul 3. Preprint. [Version 3] doi: 10.1101/2024.07.02.600461 (PMC11245009; doi:10.1101/2024.07.02.600461), 2025-06-12
Supplement: media-3.pdf [file media-3.pdf]

## 1 Supplementary Material

### 2 1. Characterization of replicate probes in EPICv2 and Comparing strategies for collapsing 3 EPICv2 replicate probes

4 In total, there are 11,529 replicate probes on EPICv2 after excluding probes on chromosomes 0  
5 and M. These replicates are distributed across chromosomes 1-22 and X, and are predominantly  
6 located within CpG islands, consistent with the intended increased coverage of these genomic  
7 regions on EPICv2 (Supplementary Figure 22). Over 80% (4,174) of these probes have two  
8 replicates each, with the largest number of replicates being ten (1 in 5,190, 0.02%).  
9

10 Given that predictive CpGs of several DNA methylation-based tools include EPICv2 replicate  
11 probes to varying extent, even some with large coefficient weights contributing substantially to  
12 the generated estimates, there is a need to collapse replicates to a single representative beta value  
13 analogous to corresponding probes on EPICv1. While significantly high correlation among  
14 replicate probes is expected, residual methylation differences between replicate probes of varying  
15 designs have been reported<sup>1</sup>. Choosing the replicate with lowest detection p-value as the  
16 representative probe has been suggested as a way to collapse replicates<sup>1</sup>, however this strategy has  
17 not been compared to other methods. To that end, we compared three strategies to collapse  
18 replicates into a single  $\beta$  value per locus: (i) previously suggested method of choosing the replicate  
19 with lowest detection *p*-value<sup>1</sup>, (ii) estimating mean of all replicates mapping to a genomic locus,  
20 and (iii) estimating median of all replicates mapping to a genomic locus, and compared  
21 representative EPICv2 replicate beta values (3602 probes) thus obtained to respective EPICv1  
22 probes. We also noted that all three methods showed significantly high correlation with EPICv1  
23 in all four cohorts: VHAS (Spearman *rho* values by strategy- detection *p*-value-based: 0.9886,  
24 mean-based: 0.9893, median-based: 0.9899), CLHNS (Spearman *rho* values by strategy-detection  
25 *p*-value-based: 0.9850, mean-based: 0.9855, median-based: 0.9859), and CALERIE (Spearman  
26 *rho* values by strategy-detection *p*-value-based: 0.9869, mean-based: 0.9856, median-based:  
27 0.9861) (Supplementary Figure 23). Comparing the three strategies to one another, we observed  
28 negligible absolute mean differences in average beta values of EPICv2 replicate probes across  
29 samples, ranging from 0.0002 - 0.0078 across the four cohorts.

30 1. Kaur, D. *et al.* Comprehensive evaluation of the Infinium human MethylationEPIC v2  
31 BeadChip. *Epigenetics Commun.* **3**, 6 (2023).  
32  
33

## 34 Supplementary Figures

35



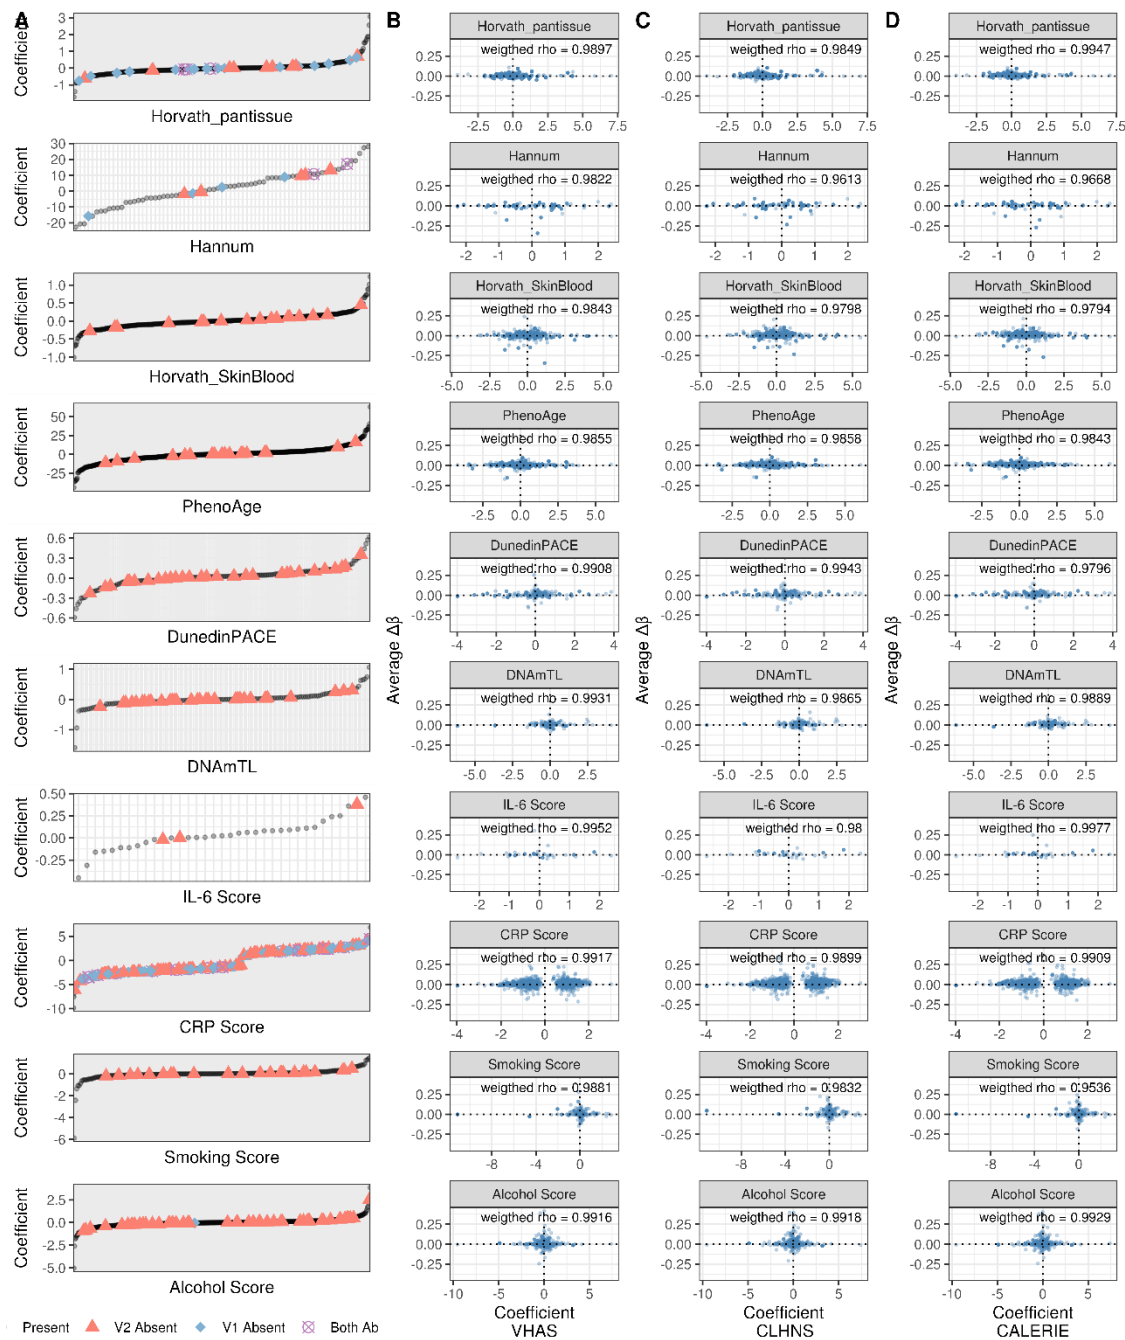

48

49 **Supplementary Figure 2.** (A) Clock and biomarker predictor CpGs absent in EPICv1 and EPICv2  
 50 and their corresponding coefficients. Both Ab: probe are absent in both EPICv1 and EPICv2. (B-  
 51 C) Average difference in beta values (EPICv2  $\beta$  - EPICv1  $\beta$ ) of clock and biomarker predictor  
 52 CpGs coefficients in (B) VHAS, (C) CLHNS, (D) CALERIE. Spearman correlation between  
 53 EPICv1 and EPICv2 beta values of clock and predictor CpGs, weighted by corresponding  
 54 coefficients are provided. IDOL CpGs, which do not have coefficients, and epiTOC CpGs, which  
 55 have equal coefficients are not shown here.

56  
57

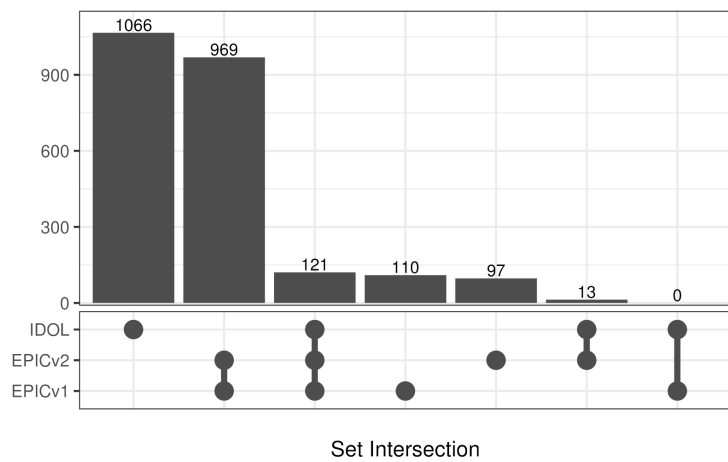

58

59 **Supplementary Figure 3.** Upset plot denoting overlap of probes selected when using the IDOL  
60 pre-selected probes and auto-selected probes in EPICv1 and EPICv2.

61

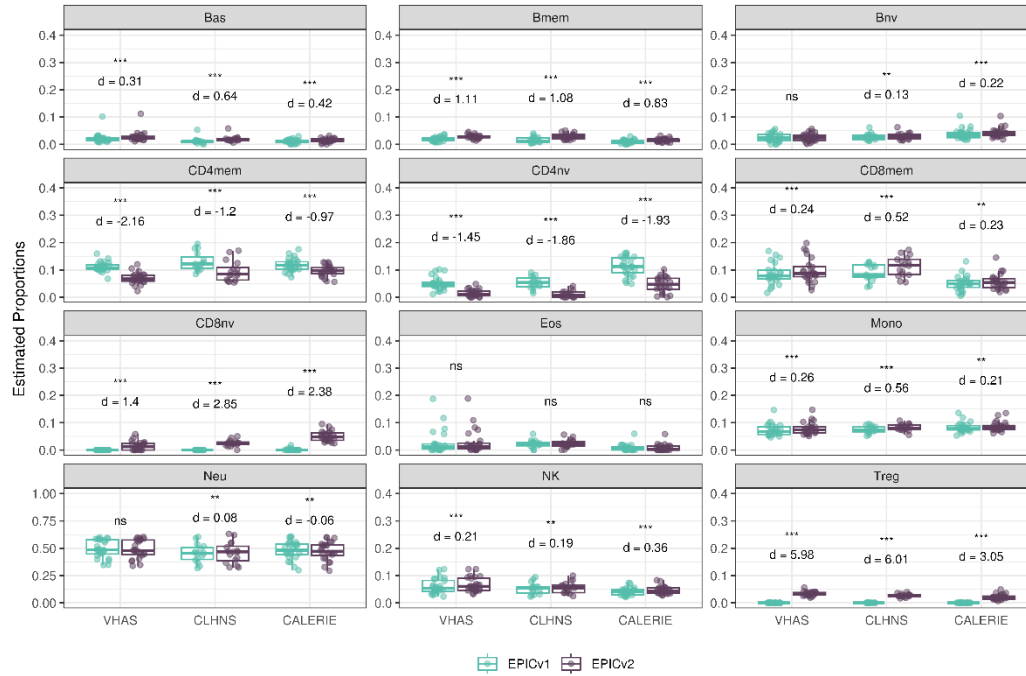

62  
 63 **Supplementary Figure 4.** Differences in DNA methylation-based immune cell type proportions  
 64 estimated using the “auto” method on matched samples assessed on EPICv1 and EPICv2 in VHAS,  
 65 CLHNS, and CALERIE. Statistical significance was defined as Bonferroni adjusted p-value <0.05.  
 66 \*\* denotes Bonferroni p <0.05, \*\*\* denotes Bonferroni p<0.001, “ns” denotes “not significant”,  
 67 and “d” denotes effect size measured using Cohen’s d. A positive Cohen’s d indicates higher  
 68 average estimated cell proportions in EPICv2 compared to EPICv1.

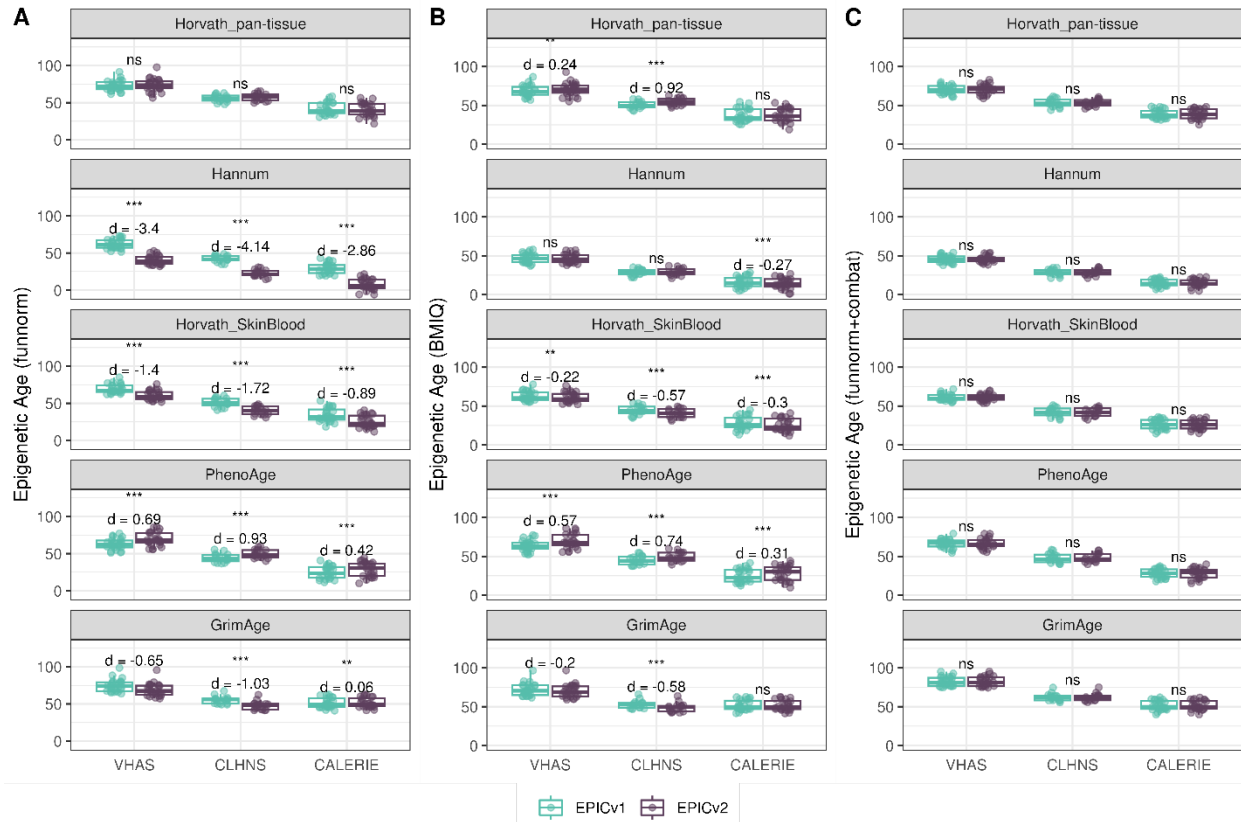

69

70 **Supplementary Figure 5.** Differences in epigenetic ages between EPICv1 and EPICv2 using the  
 71 Horvath pan-tissue, Hannum, Horvath skin and blood, PhenoAge, and GrimAge clocks in VHAS,  
 72 CLHNS, and CALERIE when **(A)** using functional normalization and **(B)** normalizing EPICv1  
 73 and EPICv2 together using BMIQ normalization. **(C)**. functional normalization with batch-  
 74 correction for EPIC version, chip and row. Statistical significance was defined as Bonferroni  
 75 adjusted p-value <0.05. \*\* denotes Bonferroni p <0.05, \*\*\* denotes Bonferroni p<0.001, “ns”  
 76 denotes “not significant”, and “d” denotes effect size measured using Cohen’s d. A positive  
 77 Cohen’s d indicates estimates in EPICv2 compared to EPICv1.

78

79

80

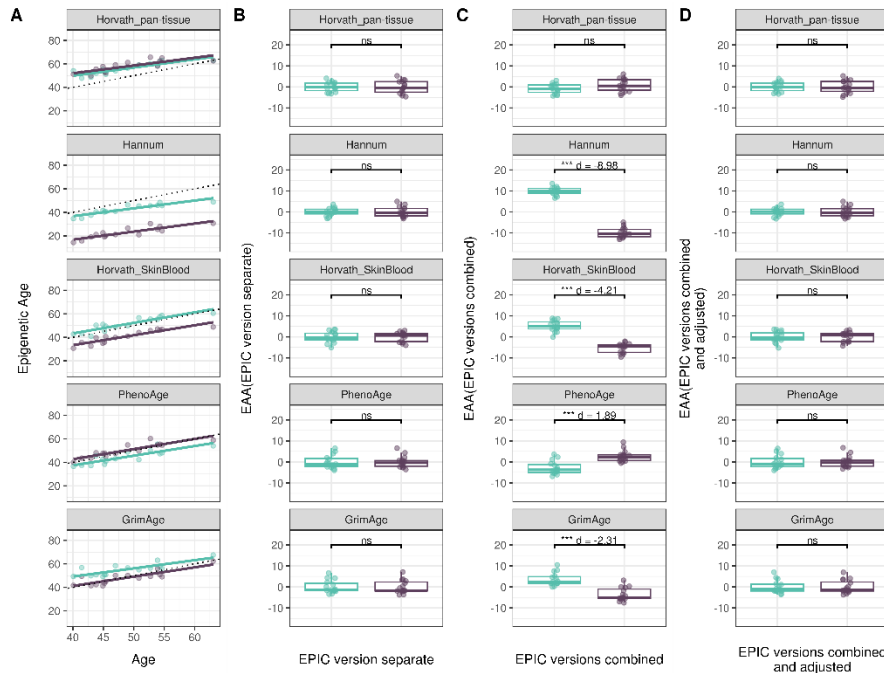

81

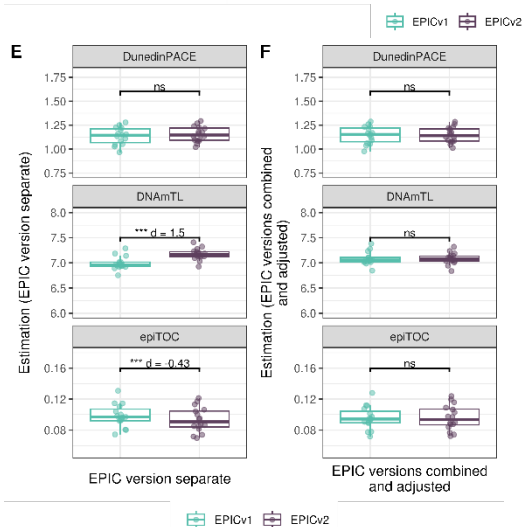

82

83 **Supplementary Figure 6.** Epigenetic age estimated on matched samples assessed on EPICv1 and  
 84 EPICv2 in CLHNS. **(A)** Scatter plot of Horvath pan-tissue, Hannum, Horvath skin and blood,  
 85 PhenoAge, and GrimAge clock estimates (Y axis) and chronological age (X axis) with dotted line  
 86 indicating  $x=y$ , coloured by EPIC version. **(B-D)** Boxplots comparing EPICv1 and EPICv2 EAAs  
 87 calculated by considering EPIC versions separately, combined, and combined and EPIC version  
 88 adjusted, respectively. **(E,F)** Boxplots comparing DunedinPACE, DNAmTL and epiTOC  
 89 estimates calculated by considering EPIC versions separately (E) and combined and EPIC version  
 90 adjusted (F), between EPICv1 and EPICv2. Statistical significance was defined as Bonferroni  
 91 adjusted p-value  $<0.05$ . \*\* denotes Bonferroni  $p <0.05$ , \*\*\* denotes Bonferroni  $p <0.001$ , “ns”  
 92 denotes “not significant”, and “d” denotes effect size measured using Cohen’s d. A positive  
 93 Cohen’s d indicates estimates in EPICv2 compared to EPICv1.

94

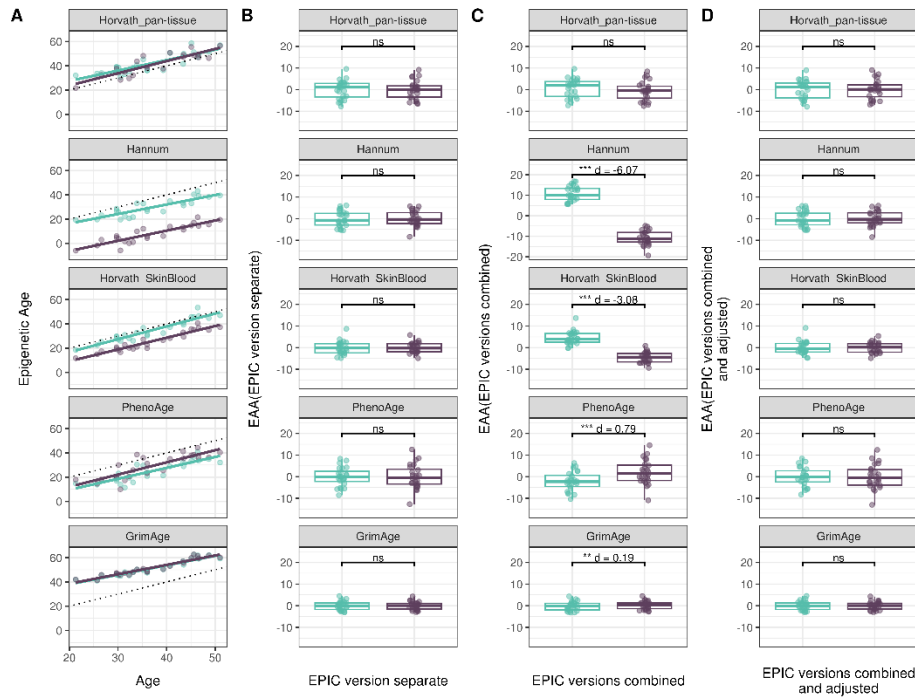

95

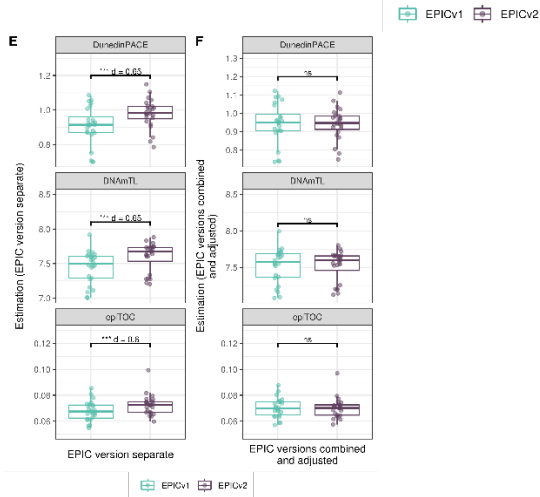

96  
97

98 **Supplementary Figure 7.** Epigenetic age estimated on matched samples assessed on EPICv1 and  
 99 EPICv2 in CALERIE. **(A)** Scatter plot of Horvath pan-tissue, Hannum, Horvath skin and blood,  
 100 PhenoAge, and GrimAge clock estimates (Y axis) and chronological age (X axis) with dotted line  
 101 indicating  $x=y$ , coloured by EPIC version. **(B-D)** Boxplots comparing EPICv1 and EPICv2 EAAs  
 102 calculated by considering EPIC versions separately, combined, and combined and EPIC version  
 103 adjusted, respectively. **(E,F)** Boxplots comparing DunedinPACE, DNAmTL and epiTOC  
 104 estimates calculated by considering EPIC versions separately (E) and combined and EPIC version  
 105 adjusted (F), between EPICv1 and EPICv2. Statistical significance was defined as Bonferroni  
 106 adjusted p-value  $<0.05$ . \*\* denotes Bonferroni  $p <0.05$ , \*\*\* denotes Bonferroni  $p <0.001$ , “ns”  
 107 denotes “not significant”, and “d” denotes effect size measured using Cohen’s d. A positive  
 108 Cohen’s d indicates estimates in EPICv2 compared to EPICv1.

109



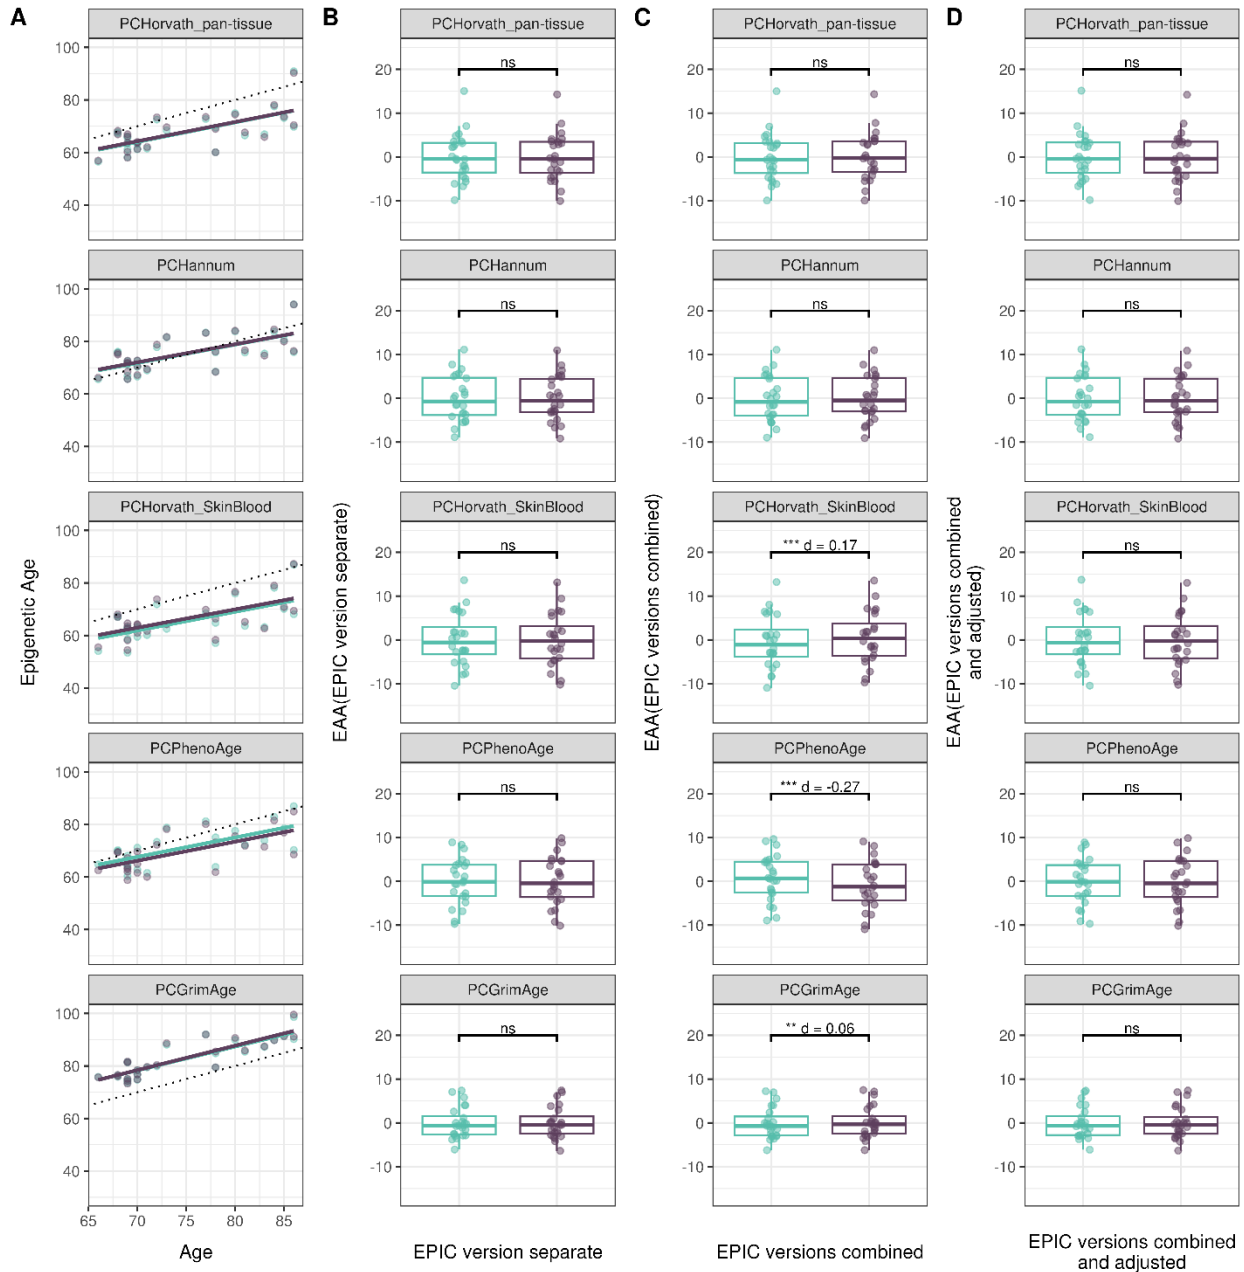

110  
111  
112  
113  
114  
115  
116  
117  
118  
119

**Supplementary Figure 8.** Epigenetic age estimated on matched samples assessed on EPICv1 and EPICv2 in VHAS. **(A)** Scatter plot of PC clocks of Horvath pan-tissue, Hannum, Horvath skin and blood, PhenoAge, and GrimAge clock ages (Y axis) and chronological age (X axis) with dotted line indicating  $x=y$ , coloured by EPIC version. **(B, C and D)** Boxplots comparing EPICv1 and EPICv2 EAAs calculated by considering EPIC versions separately, combined, and combined and EPIC version adjusted, respectively. Statistical significance was defined as Bonferroni adjusted p-value  $<0.05$ . \*\* denotes Bonferroni  $p <0.05$ , \*\*\* denotes Bonferroni  $p <0.001$ , “ns” denotes “not significant”, and “d” denotes effect size measured using Cohen’s d. A positive Cohen’s d indicates higher estimates in EPICv2 compared to EPICv1.

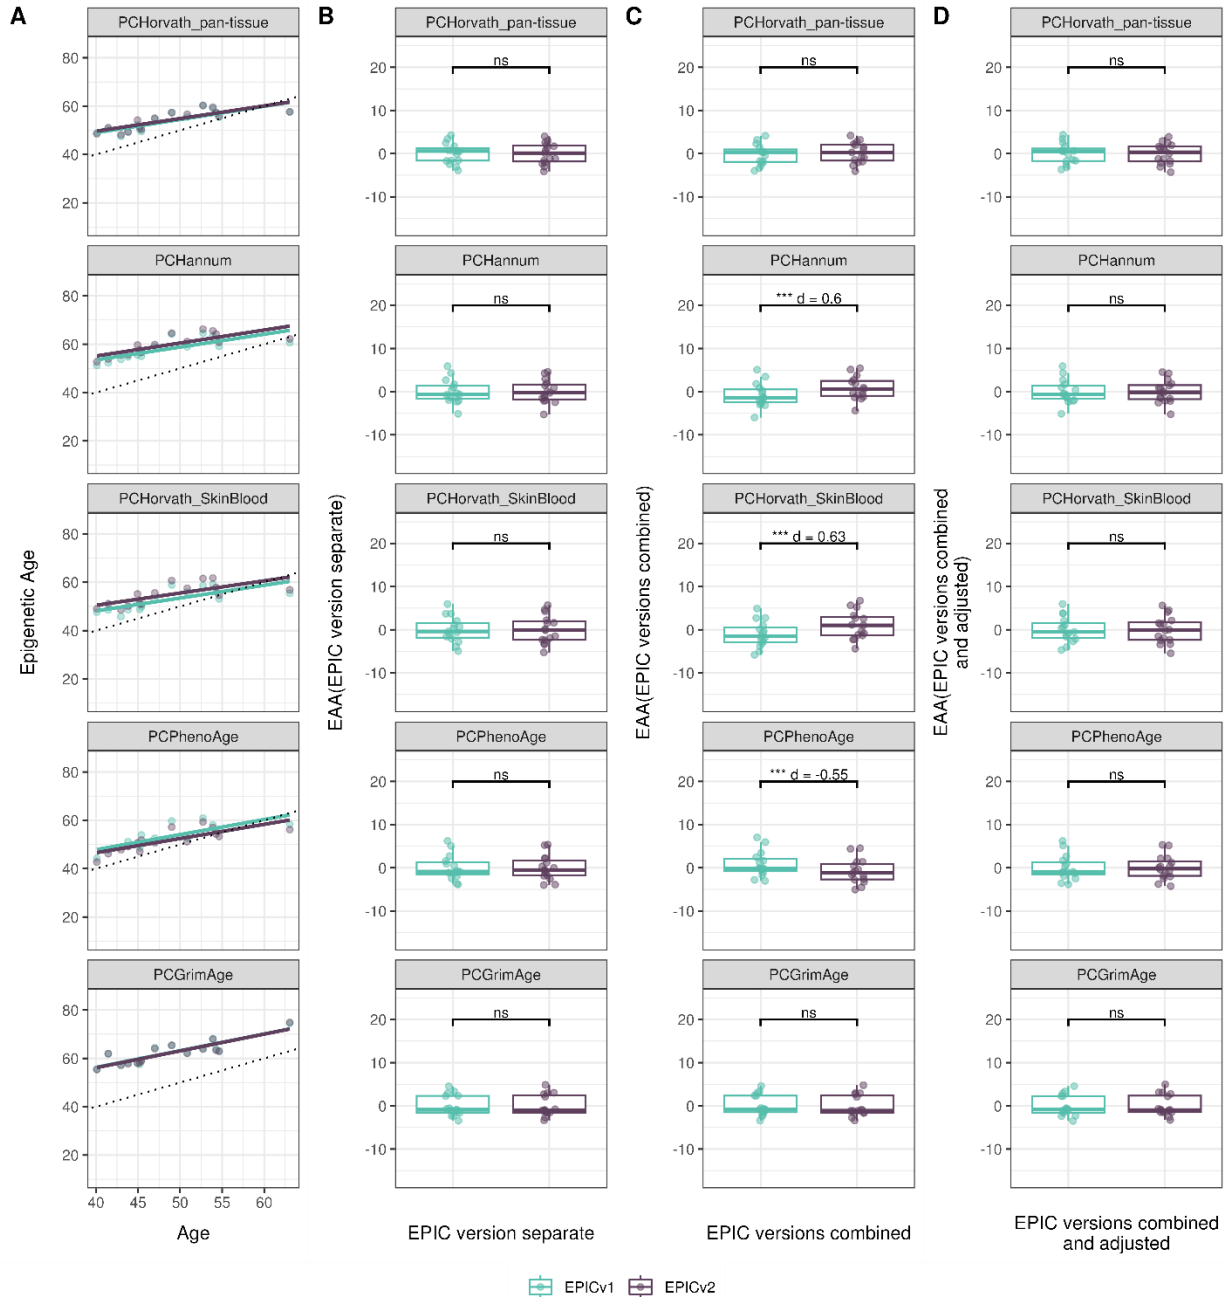

120

121 **Supplementary Figure 9.** Epigenetic age estimated on matched samples assessed on EPICv1 and  
 122 EPICv2 in CLHNS. **(A)** Scatter plot of PC clocks of Horvath pan-tissue, Hannum, Horvath skin  
 123 and blood, PhenoAge, and GrimAge clock ages (Y axis) and chronological age (X axis) with dotted  
 124 line indicating  $x=y$ , coloured by EPIC version. **(B, C and D)** Boxplots comparing EPICv1 and  
 125 EPICv2 EAAs calculated by considering EPIC versions separately, combined, and combined and  
 126 EPIC version adjusted, respectively. Statistical significance was defined as Bonferroni adjusted p-  
 127 value  $<0.05$ . \*\* denotes Bonferroni  $p <0.05$ , \*\*\* denotes Bonferroni  $p <0.001$ , “ns” denotes “not  
 128 significant”, and “d” denotes effect size measured using Cohen’s d. A positive Cohen’s d indicates  
 129 higher estimates in EPICv2 compared to EPICv1.

130

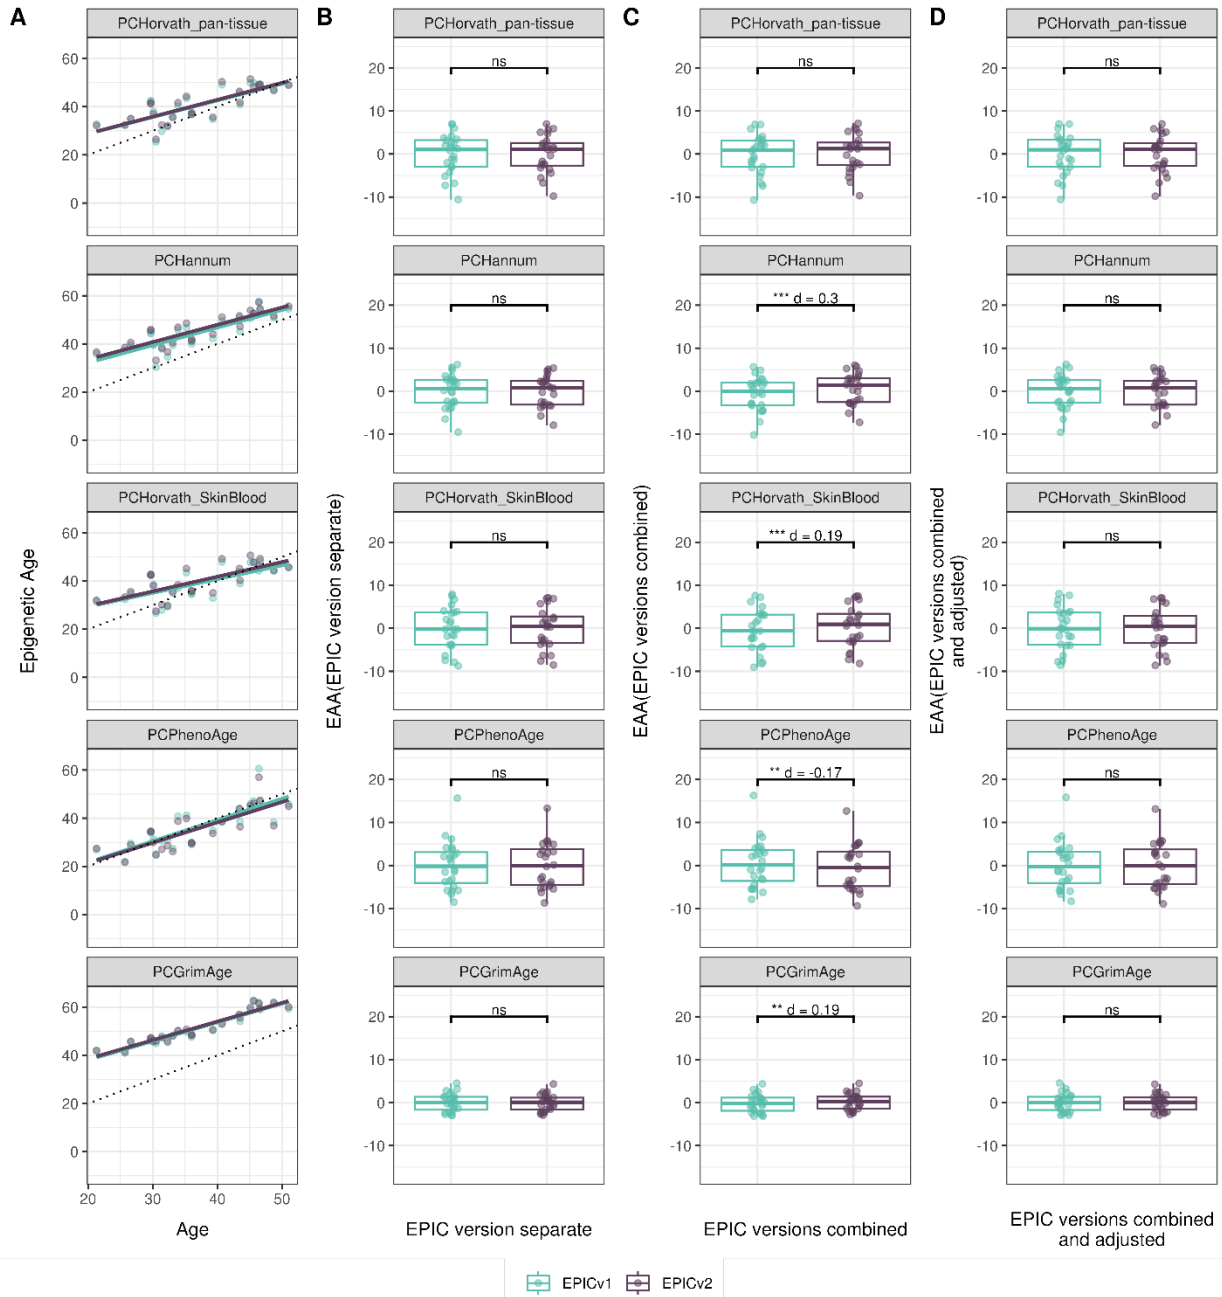

131

132 **Supplementary Figure 10.** Epigenetic age estimated on matched samples assessed on EPICv1  
 133 and EPICv2 in CALERIE. **(A)** Scatter plot of PC clocks of Horvath pan-tissue, Hannum, Horvath  
 134 skin and blood, PhenoAge, and GrimAge clock ages (Y axis) and chronological age (X axis) with  
 135 dotted line indicating  $x=y$ , coloured by EPIC version. **(B, C and D)** Boxplots comparing EPICv1  
 136 and EPICv2 EAAs calculated by considering EPIC versions separately, combined, and combined  
 137 and EPIC version adjusted, respectively. Statistical significance was defined as Bonferroni  
 138 adjusted p-value  $<0.05$ . \*\* denotes Bonferroni  $p <0.05$ , \*\*\* denotes Bonferroni  $p <0.001$ , "ns"  
 139 denotes "not significant", and "d" denotes effect size measured using Cohen's d. A positive  
 140 Cohen's d indicates higher estimates in EPICv2 compared to EPICv1.

141

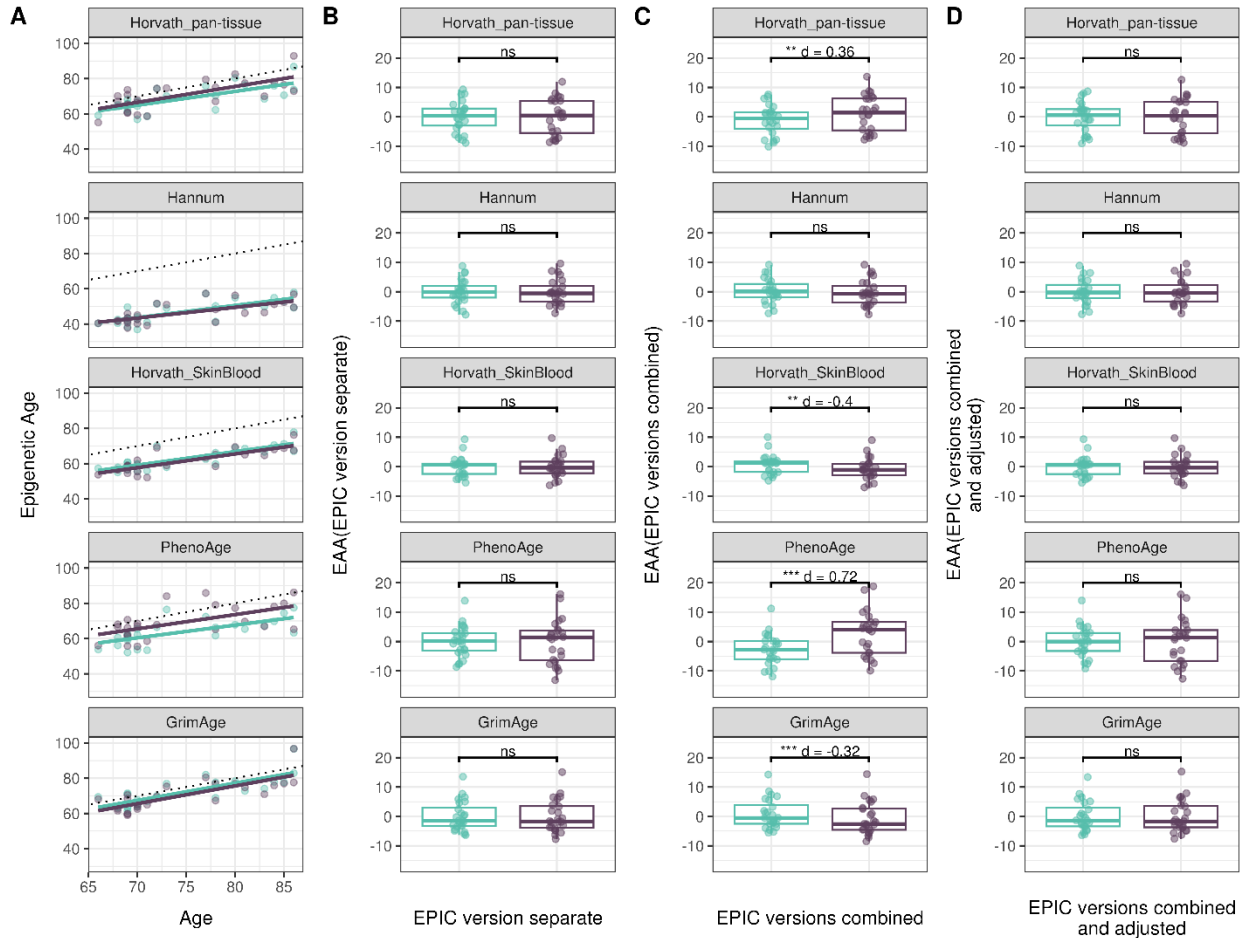

142

143 **Supplementary Figure 11.** Epigenetic clock estimates obtained after normalizing EPICv1 and  
 144 EPICv2 together using BMIQ in the VHAS cohort. (B-D) Boxplots comparing Horvath pan-tissue,  
 145 Hannum, Horvath skin and blood, PhenoAge, and GrimAge EAA, calculated on normalizing EPIC  
 146 versions together, between EPICv1 and EPICv2. Statistical significance was defined as Bonferroni  
 147 adjusted p-value <0.05. \*\* denotes Bonferroni p <0.05, \*\*\* denotes Bonferroni p <0.001, "ns"  
 148 denotes "not significant", and "d" denotes effect size measured using Cohen's d. A positive  
 149 Cohen's d indicates higher estimates in EPICv2 compared to EPICv1.

150

151

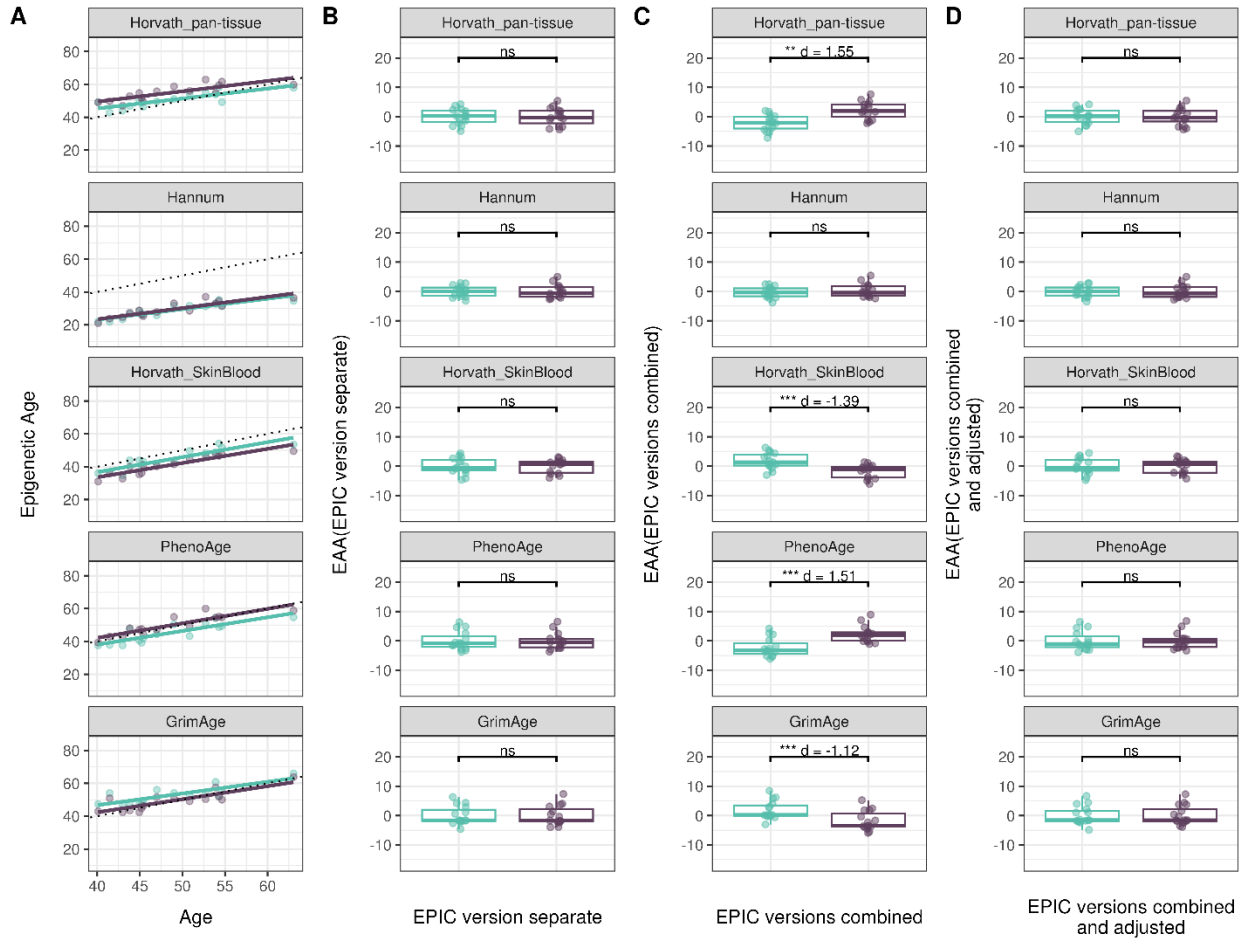

152

153 **Supplementary Figure 12.** Epigenetic clock estimates obtained after normalizing EPICv1 and  
 154 EPICv2 together using BMIQ in the CLHNS cohort. **(B-D)** Boxplots comparing Horvath pan-  
 155 tissue, Hannum, Horvath skin and blood, PhenoAge, and GrimAge EAA, calculated on  
 156 normalizing EPIC versions together, between EPICv1 and EPICv2. Statistical significance was  
 157 defined as Bonferroni adjusted p-value <0.05. \*\* denotes Bonferroni p <0.05, \*\*\* denotes  
 158 Bonferroni p<0.001, “ns” denotes “not significant”, and “d” denotes effect size measured using  
 159 Cohen’s d. A positive Cohen’s d indicates higher estimates in EPICv2 compared to EPICv1.

160

161

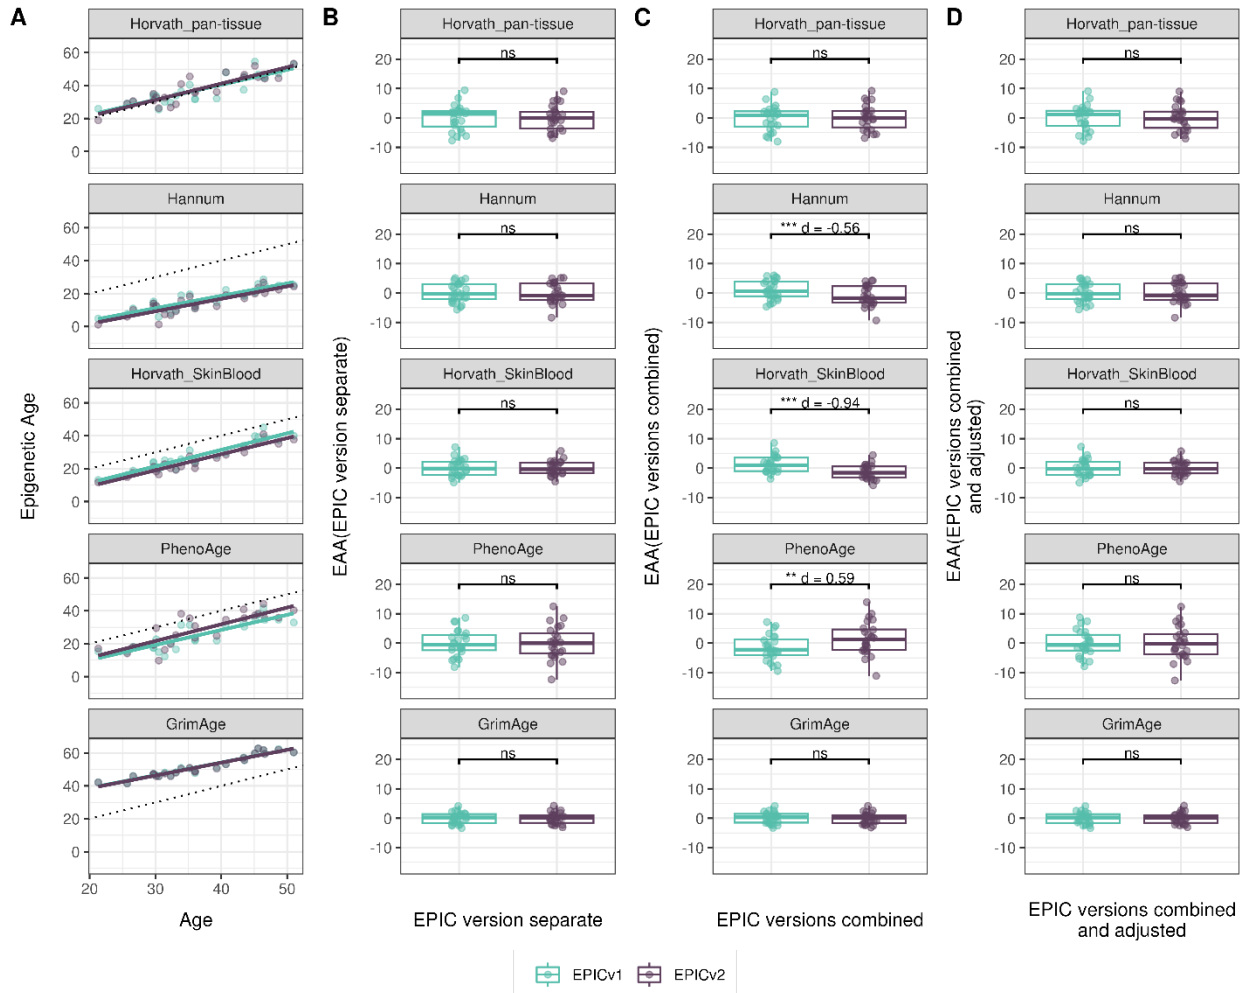

162

163 **Supplementary Figure 13.** Epigenetic clock estimates obtained after normalizing EPICv1 and  
 164 EPICv2 together using BMIQ in the CALERIE cohort. **(B-D)** Boxplots comparing Horvath pan-  
 165 tissue, Hannum, Horvath skin and blood, PhenoAge, and GrimAge EAA, calculated on  
 166 normalizing EPIC versions together, between EPICv1 and EPICv2. Statistical significance was  
 167 defined as Bonferroni adjusted p-value <0.05. \*\* denotes Bonferroni p <0.05, \*\*\* denotes  
 168 Bonferroni p<0.001, “ns” denotes “not significant”, and “d” denotes effect size measured using  
 169 Cohen’s d. A positive Cohen’s d indicates higher estimates in EPICv2 compared to EPICv1.

170  
171

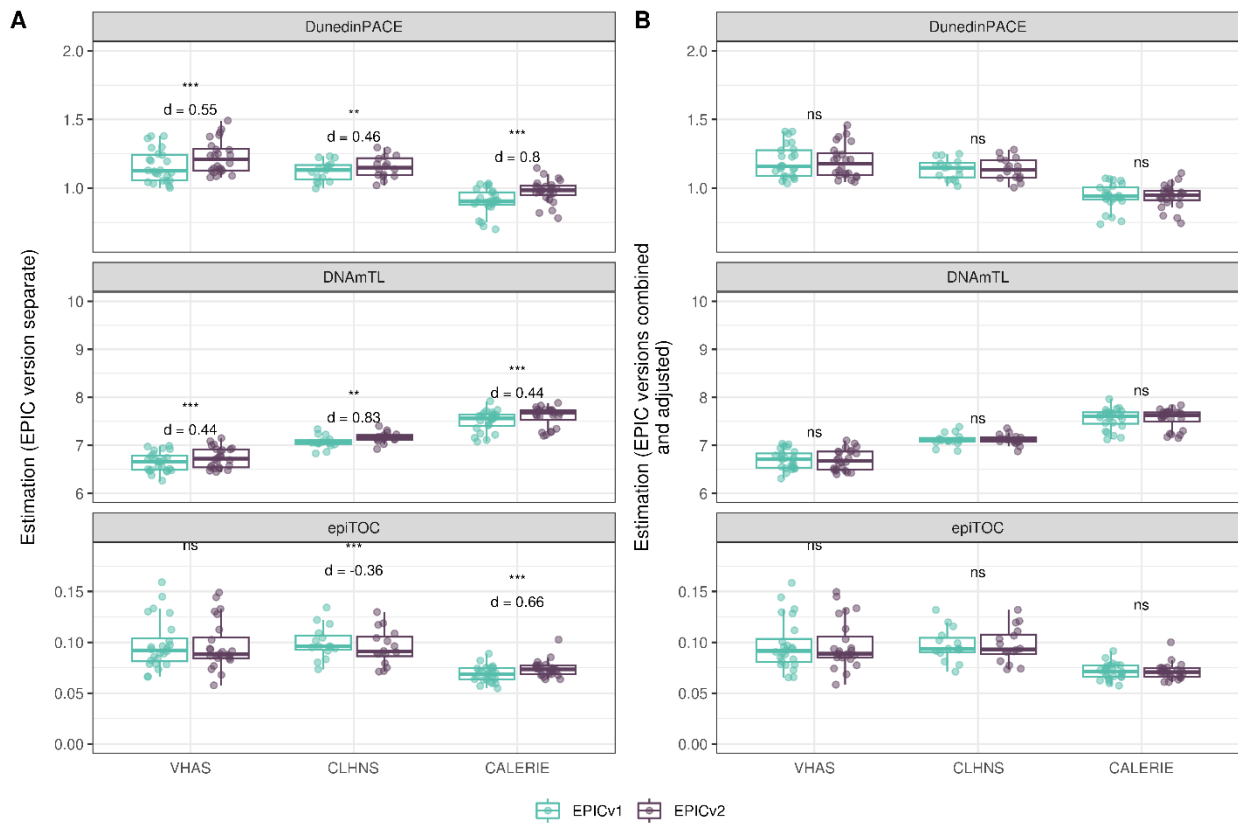

172

173 **Supplementary Figure 14.** Rate-based clock estimates obtained after normalizing EPICv1 and  
174 EPICv2 together using BMIQ in VHAS, CLHNS, and CALERIE. Boxplots comparing  
175 DunedinPACE, DNAmTL and epiTOC estimates calculated by considering EPIC versions  
176 separately (A) and combined and EPIC version adjusted (B). Statistical significance was defined  
177 as Bonferroni adjusted  $p$ -value  $< 0.05$ . \*\* denotes Bonferroni  $p < 0.05$ , \*\*\* denotes Bonferroni  $p$   
178  $< 0.001$ , “ns” denotes “not significant”, and “d” denotes effect size measured using Cohen’s d. A  
179 positive Cohen’s d indicates estimates in EPICv2 compared to EPICv1.

180

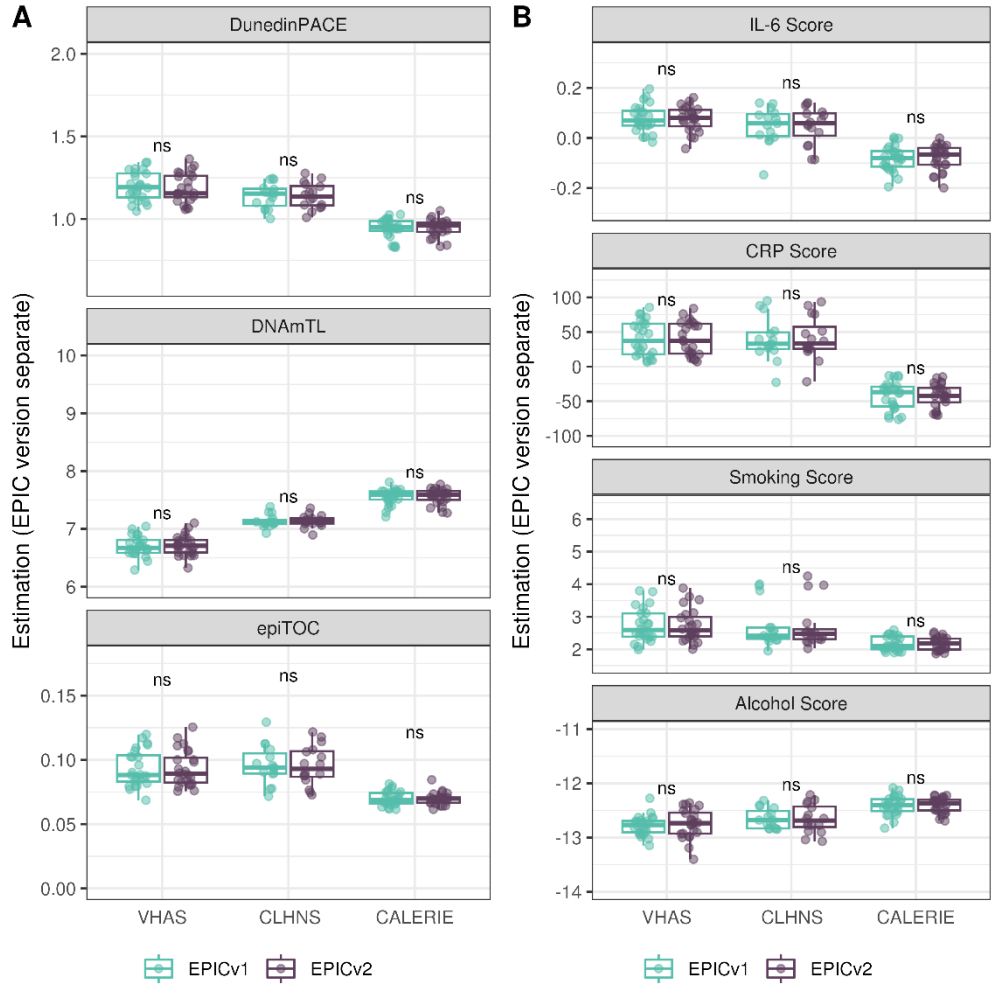

181

182 **Supplementary Figure 15.** Rate-based clock and DNA methylation-based predictor estimates  
 183 calculated by considering EPIC versions separately after functional normalization with batch-  
 184 correction for EPIC version, chip and row in VHAS, CLHNS, and CALERIE. **(A)** rate-based  
 185 clocks **(B)**. DNA methylation-based predictors. Statistical significance was defined as Bonferroni  
 186 adjusted  $p$ -value  $<0.05$ . \*\* denotes Bonferroni  $p <0.05$ , \*\*\* denotes Bonferroni  $p <0.001$ , “ns”  
 187 denotes “not significant”, and “d” denotes effect size measured using Cohen’s d. A positive  
 188 Cohen’s d indicates estimates in EPICv2 compared to EPICv1.

189



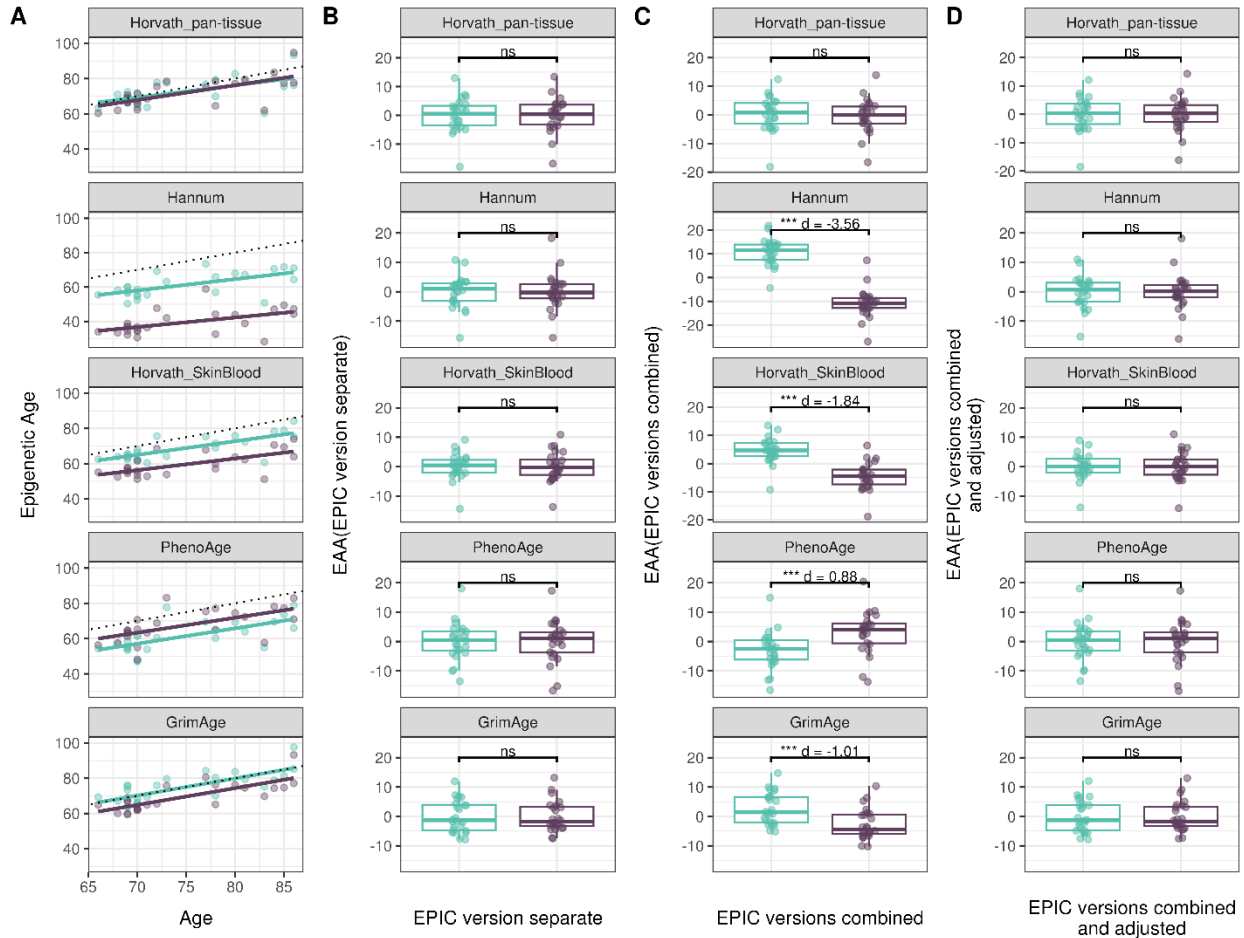

190

191 **Supplementary Figure 16.** Epigenetic age estimated on matched samples assessed on EPICv1  
 192 and EPICv2 in VHAS capillary blood samples. **(A)** Scatter plot of Horvath pan-tissue, Hannum,  
 193 Horvath skin and blood, PhenoAge, and GrimAge clock ages (Y axis) and chronological age (X  
 194 axis) with dotted line indicating  $x=y$ , coloured by EPIC version. **(B, C and D)** Boxplots comparing  
 195 EPICv1 and EPICv2 EAAs calculated by considering EPIC versions separately, combined, and  
 196 combined and EPIC version adjusted, respectively. Statistical significance was defined as  
 197 Bonferroni adjusted p-value  $<0.05$ . \*\* denotes Bonferroni  $p <0.05$ , \*\*\* denotes Bonferroni  
 198  $p <0.001$ , “ns” denotes “not significant”, and “d” denotes effect size measured using Cohen’s d. A  
 199 positive Cohen’s d indicates higher estimates in EPICv2 compared to EPICv1.

200

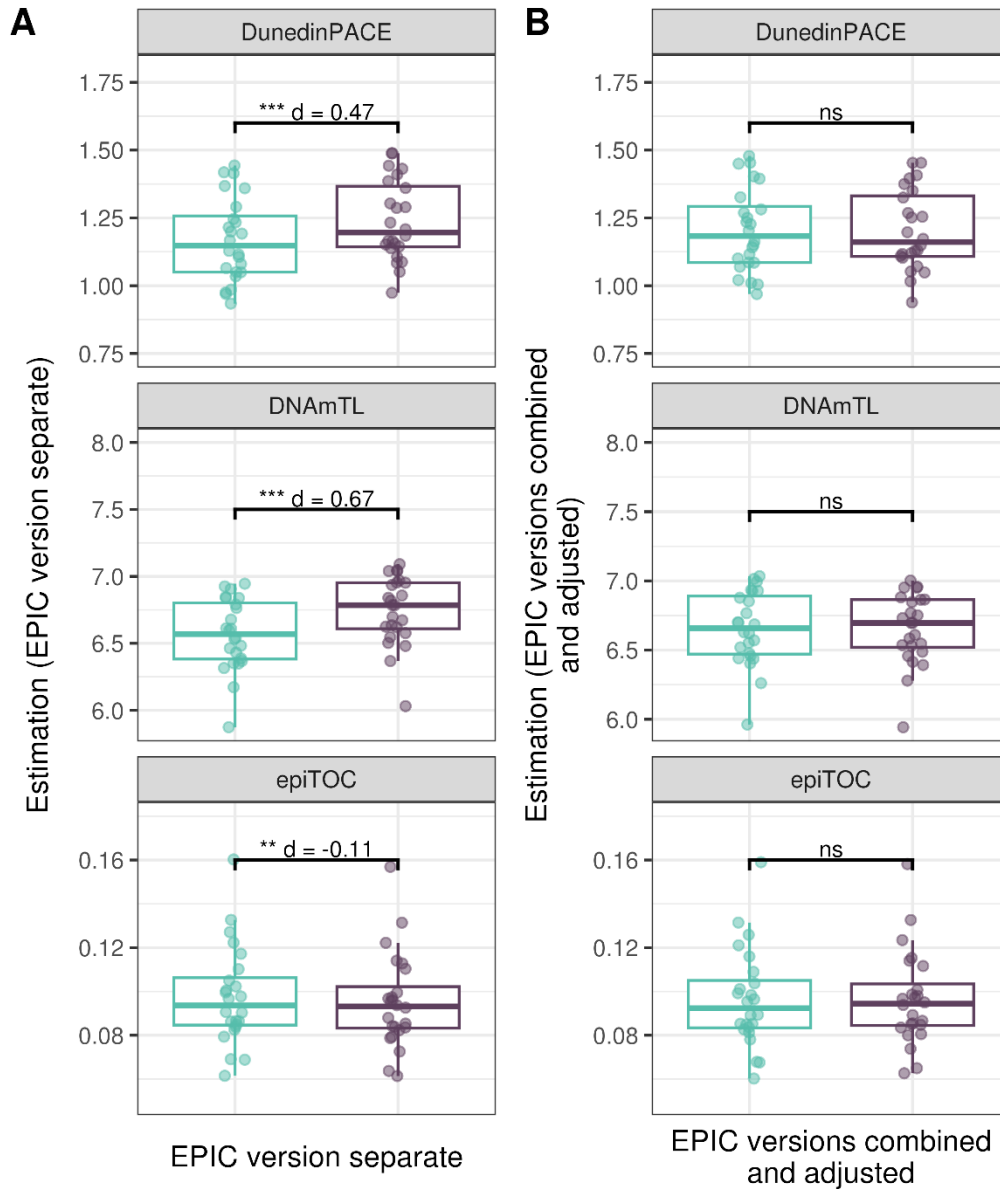

EPICv1 EPICv2

201

202 **Supplementary Figure 17.** Rate-based clock estimates on matched samples assessed on EPICv1  
 203 and EPICv2 in VHAS capillary blood samples. Boxplots comparing DunedinPACE, DNAmTL  
 204 and epiTOC estimates calculated by considering EPIC versions separately (**A**) and combined and  
 205 EPIC version adjusted (**B**), between EPICv1 and EPICv2. Statistical significance was defined as  
 206 Bonferroni adjusted  $p$ -value  $<0.05$ . \*\* denotes Bonferroni  $p <0.05$ , \*\*\* denotes Bonferroni  $p$   
 207  $<0.001$ , “ns” denotes “not significant”, and “d” denotes effect size measured using Cohen’s d. A  
 208 positive Cohen’s d indicates estimates in EPICv2 compared to EPICv1.

209

210

211

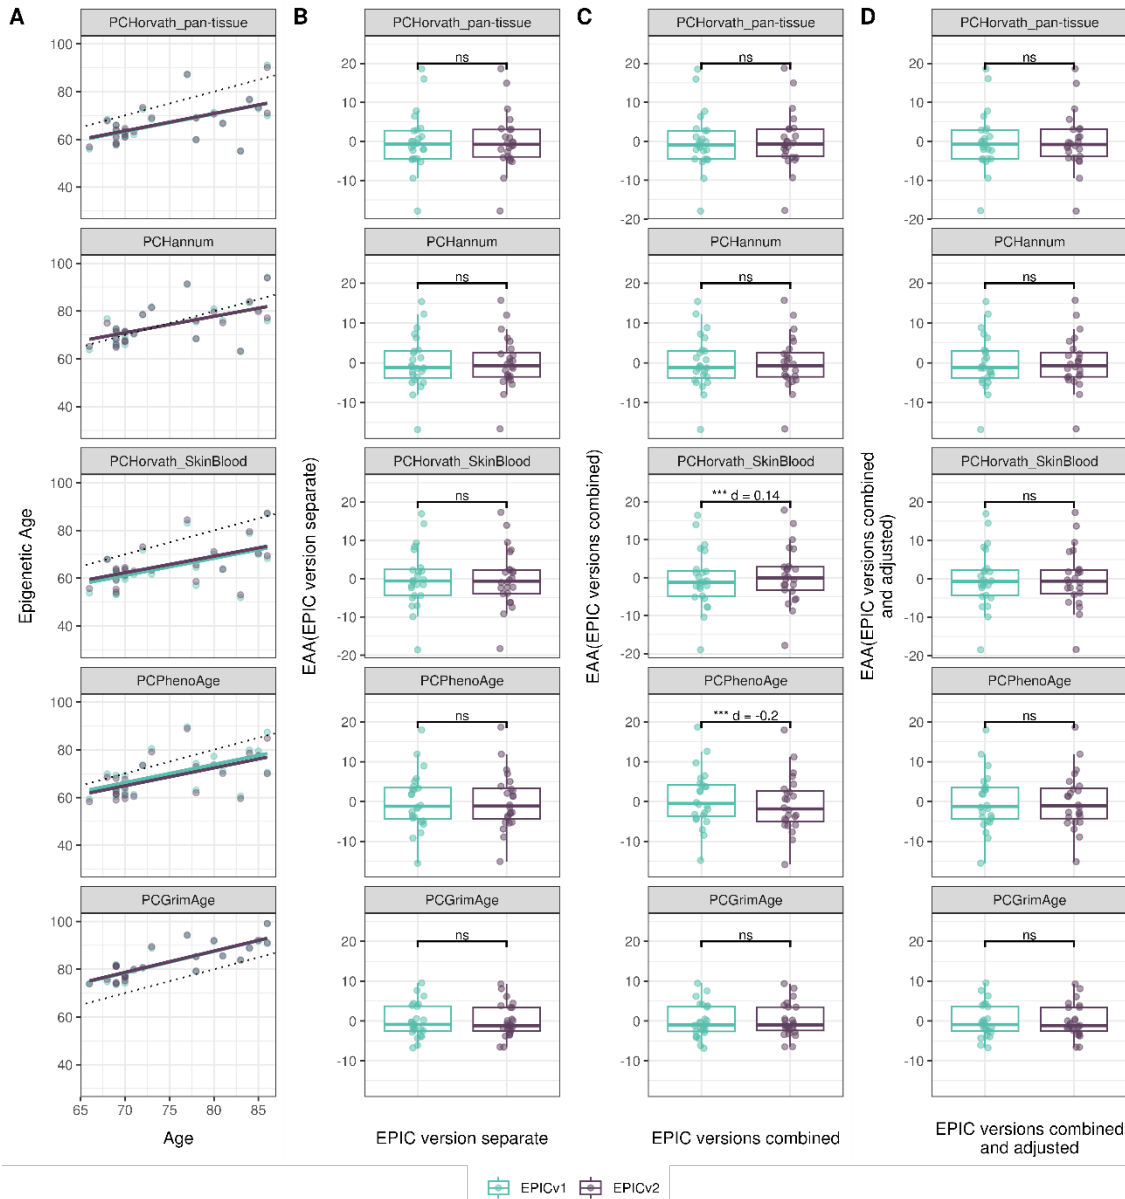

212  
213

214 **Supplementary Figure 18.** Epigenetic age estimated on matched samples assessed on EPICv1  
 215 and EPICv2 in VHAS capillary blood samples. **(A)** Scatter plot of PC clocks of Horvath pan-  
 216 tissue, Hannum, Horvath skin and blood, PhenoAge, and GrimAge clock ages (Y axis) and  
 217 chronological age (X axis) with dotted line indicating x=y, coloured by EPIC version. **(B, C and**  
 218 **D)** Boxplots comparing EPICv1 and EPICv2 EAAs calculated by considering EPIC versions  
 219 separately, combined, and combined and EPIC version adjusted, respectively. Statistical  
 220 significance was defined as Bonferroni adjusted p-value <0.05. \*\* denotes Bonferroni p <0.05,  
 221 \*\*\* denotes Bonferroni p <0.001, “ns” denotes “not significant”, and “d” denotes effect size  
 222 measured using Cohen’s d. A positive Cohen’s d indicates higher estimates in EPICv2 compared  
 223 to EPICv1.

224

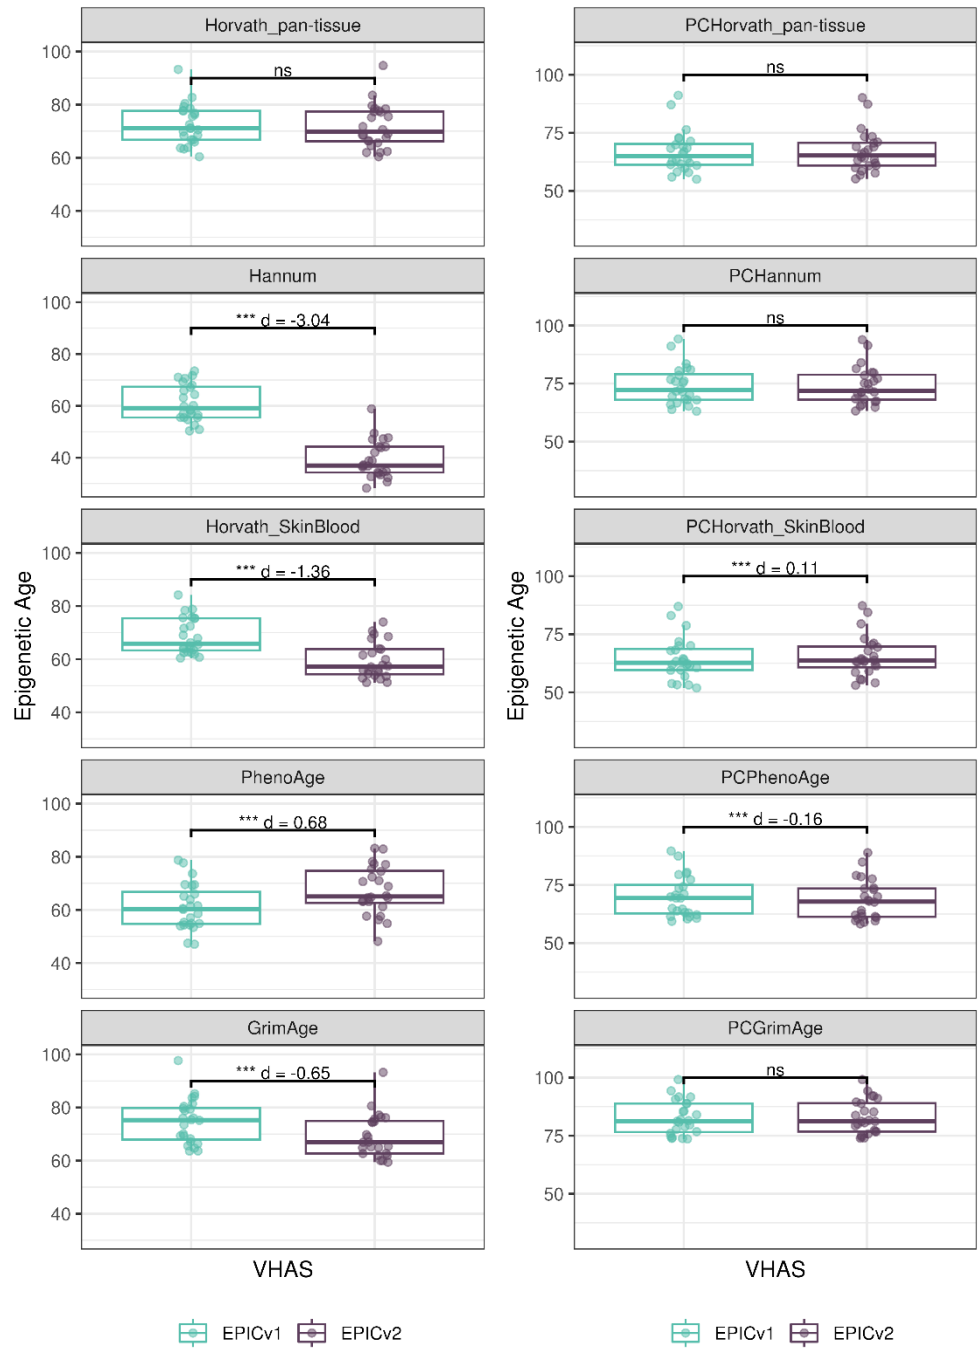

225  
 226  
 227  
 228  
 229

**Supplementary Figure 19.** Differences in epigenetic ages between EPICv1 and EPICv2 using the Horvath pan-tissue, Hannum, Horvath skin and blood, PhenoAge, GrimAge clocks, and PC clocks in VHAS capillary blood samples.

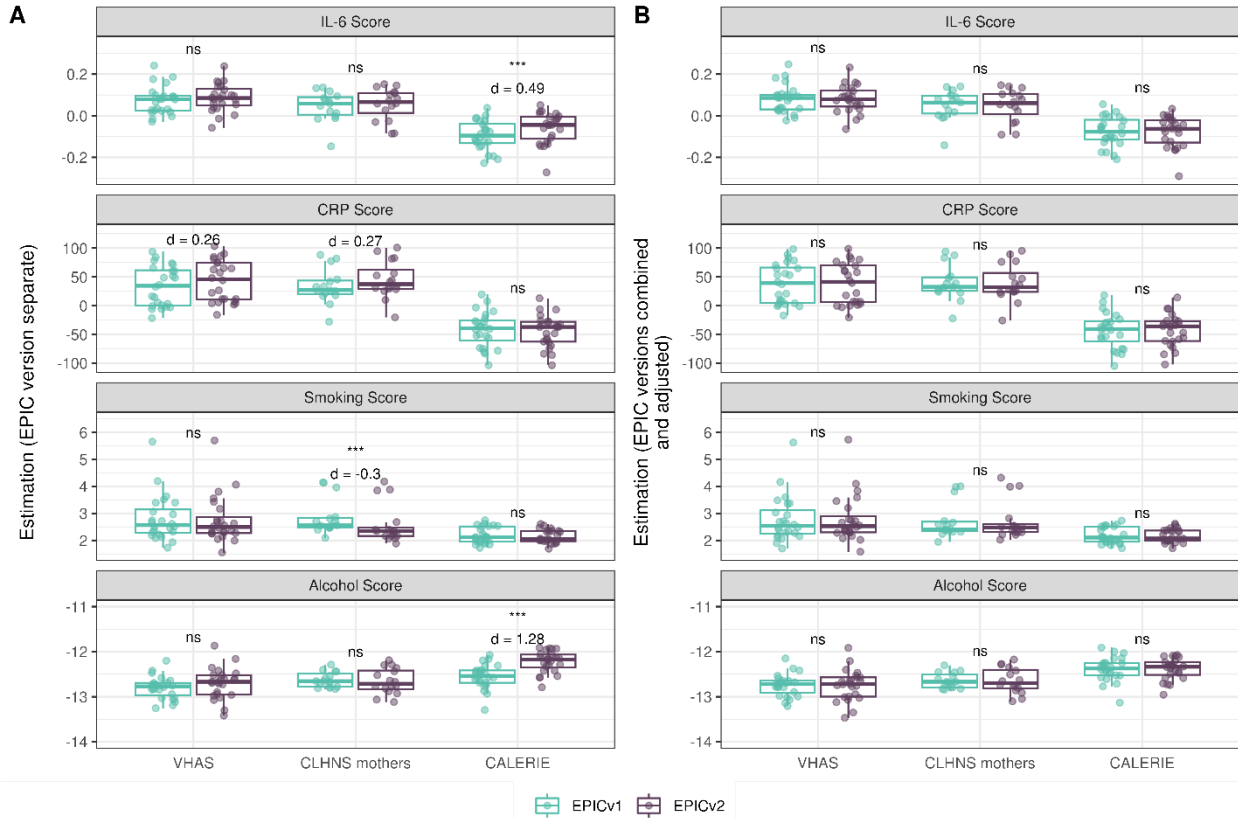

231

232 **Supplementary Figure 20.** DNA methylation-based predictors estimated on matched samples  
 233 assessed on EPICv1 and EPICv2 in VHAS, CLHNS, and CALERIE. Boxplots comparing EPICv1  
 234 and EPICv2 proxy IL-6, CRP, smoking, and alcohol scores calculated by considering (A)  
 235 EPIC versions separately, and (B) combined and EPIC version adjusted. Statistical significance  
 236 was defined as Bonferroni adjusted p-value <0.05. \*\* denotes Bonferroni p <0.05, \*\*\* denotes  
 237 Bonferroni p <0.001, “ns” denotes “not significant”, and “d” denotes effect size measured using  
 238 Cohen’s d. A positive Cohen’s d indicates higher average estimated cell proportions in EPICv2  
 239 compared to EPICv1.

240

241

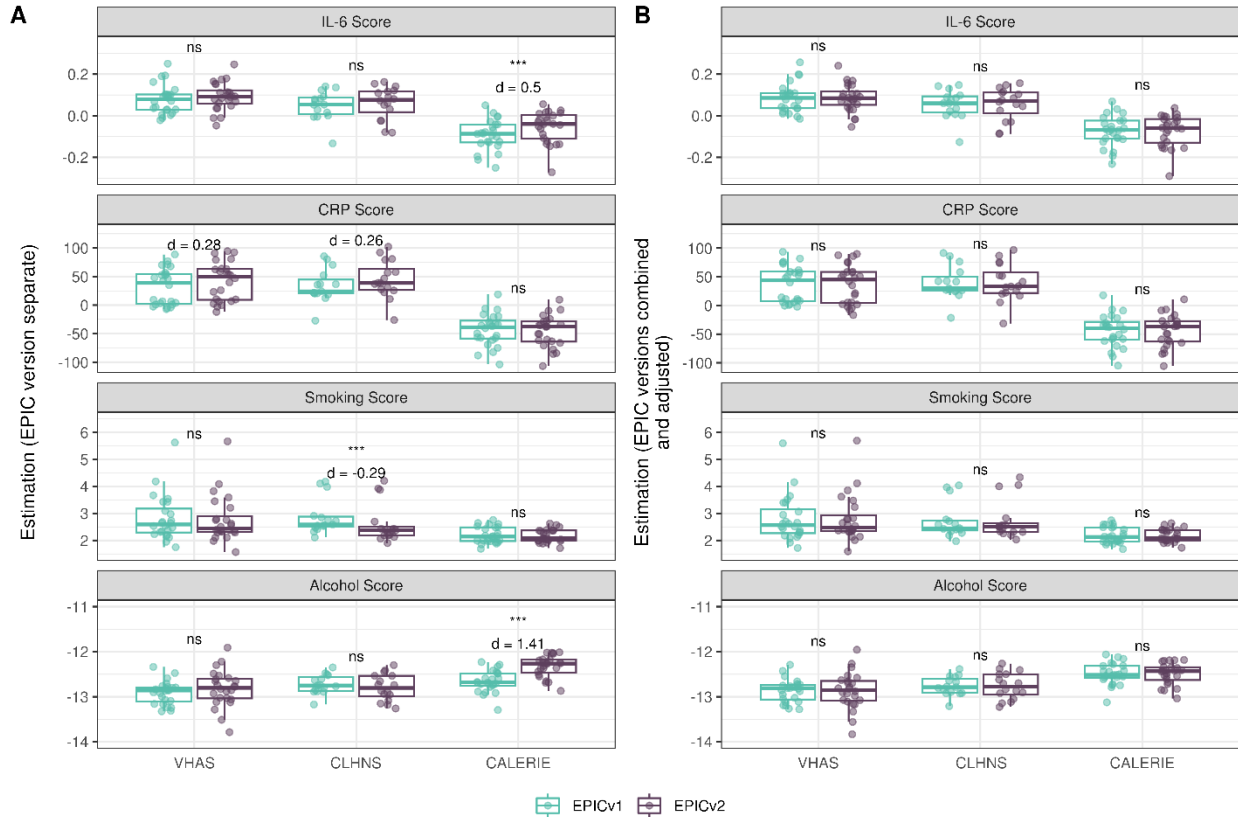

243

244 **Supplementary Figure 21.** DNA methylation-based predictors estimated after normalizing  
 245 EPICv1 and EPICv2 together using BMIQ in VHAS, CLHNS, and CALERIE. Boxplots  
 246 comparing EPICv1 and EPICv2 proxy IL-6, CRP, smoking, and alcohol scores calculated by  
 247 considering EPIC versions separately (A), and combined and EPIC version adjusted (B). Statistical  
 248 significance was defined as Bonferroni adjusted p-value <0.05. \*\* denotes Bonferroni p <0.05,  
 249 \*\*\* denotes Bonferroni p<0.001, “ns” denotes “not significant”, and “d” denotes effect size  
 250 measured using Cohen’s d. A positive Cohen’s d indicates higher average estimated cell  
 251 proportions in EPICv2 compared to EPICv1.

252

253  
254  
255  
256

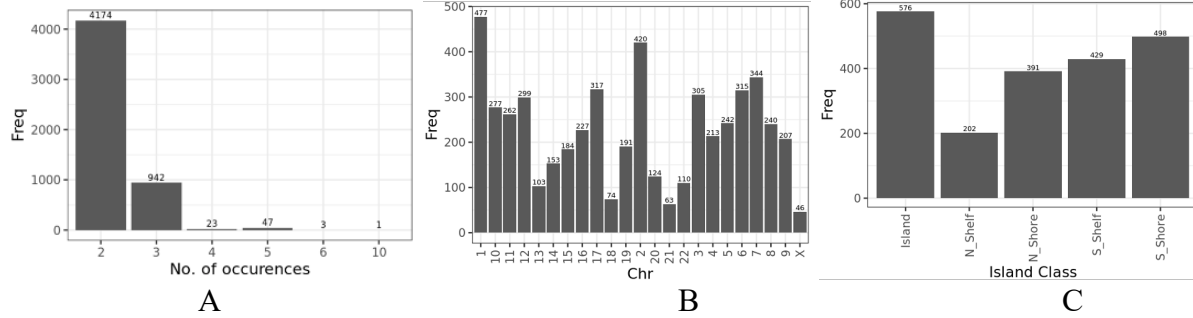

257  
258

259 **Supplementary Figure 22:** Frequency of occurrence of replicate probes on EPIC v2 (A), their  
260 distribution across chromosomes (B), and CpG island classes (C).  
261  
262

263  
264

(A) VHAS

(B) CLHNS

(C) CALERIE

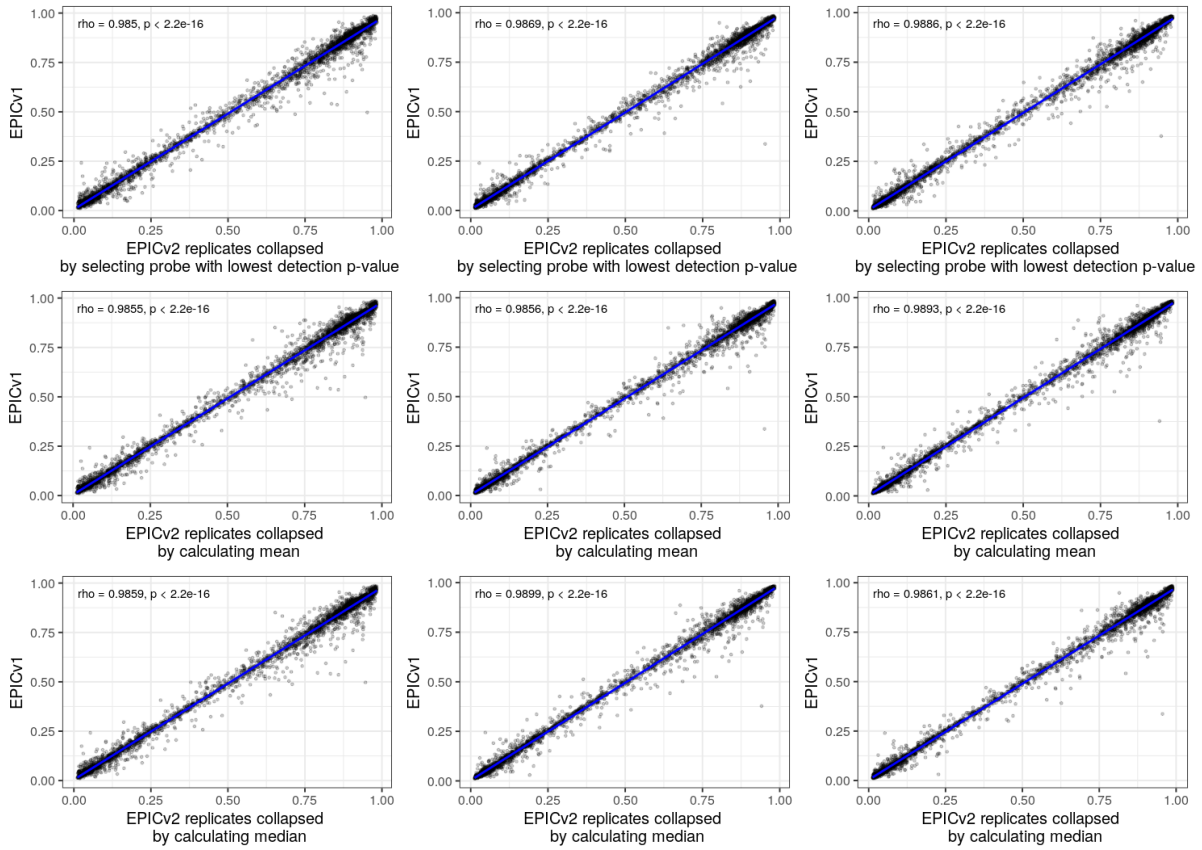

265

266

267  
268  
269  
270  
271  
272  
273

**Supplementary Figure 23:** Spearman correlation between  $\beta$  values of EPICv2 replicate probes and corresponding EPICv1 probes (n=3602). EPICv2 replicate probes were collapsed to obtain a single  $\beta$  value using detection  $p$ -value (row 1), mean (row 2), and median (row 3) based strategies for (A) VHAS, (B) CLHNS, and (C) CALERIE.
